# Supplementary material
Source: PubMed Central journal article supplement (PMC6628338)

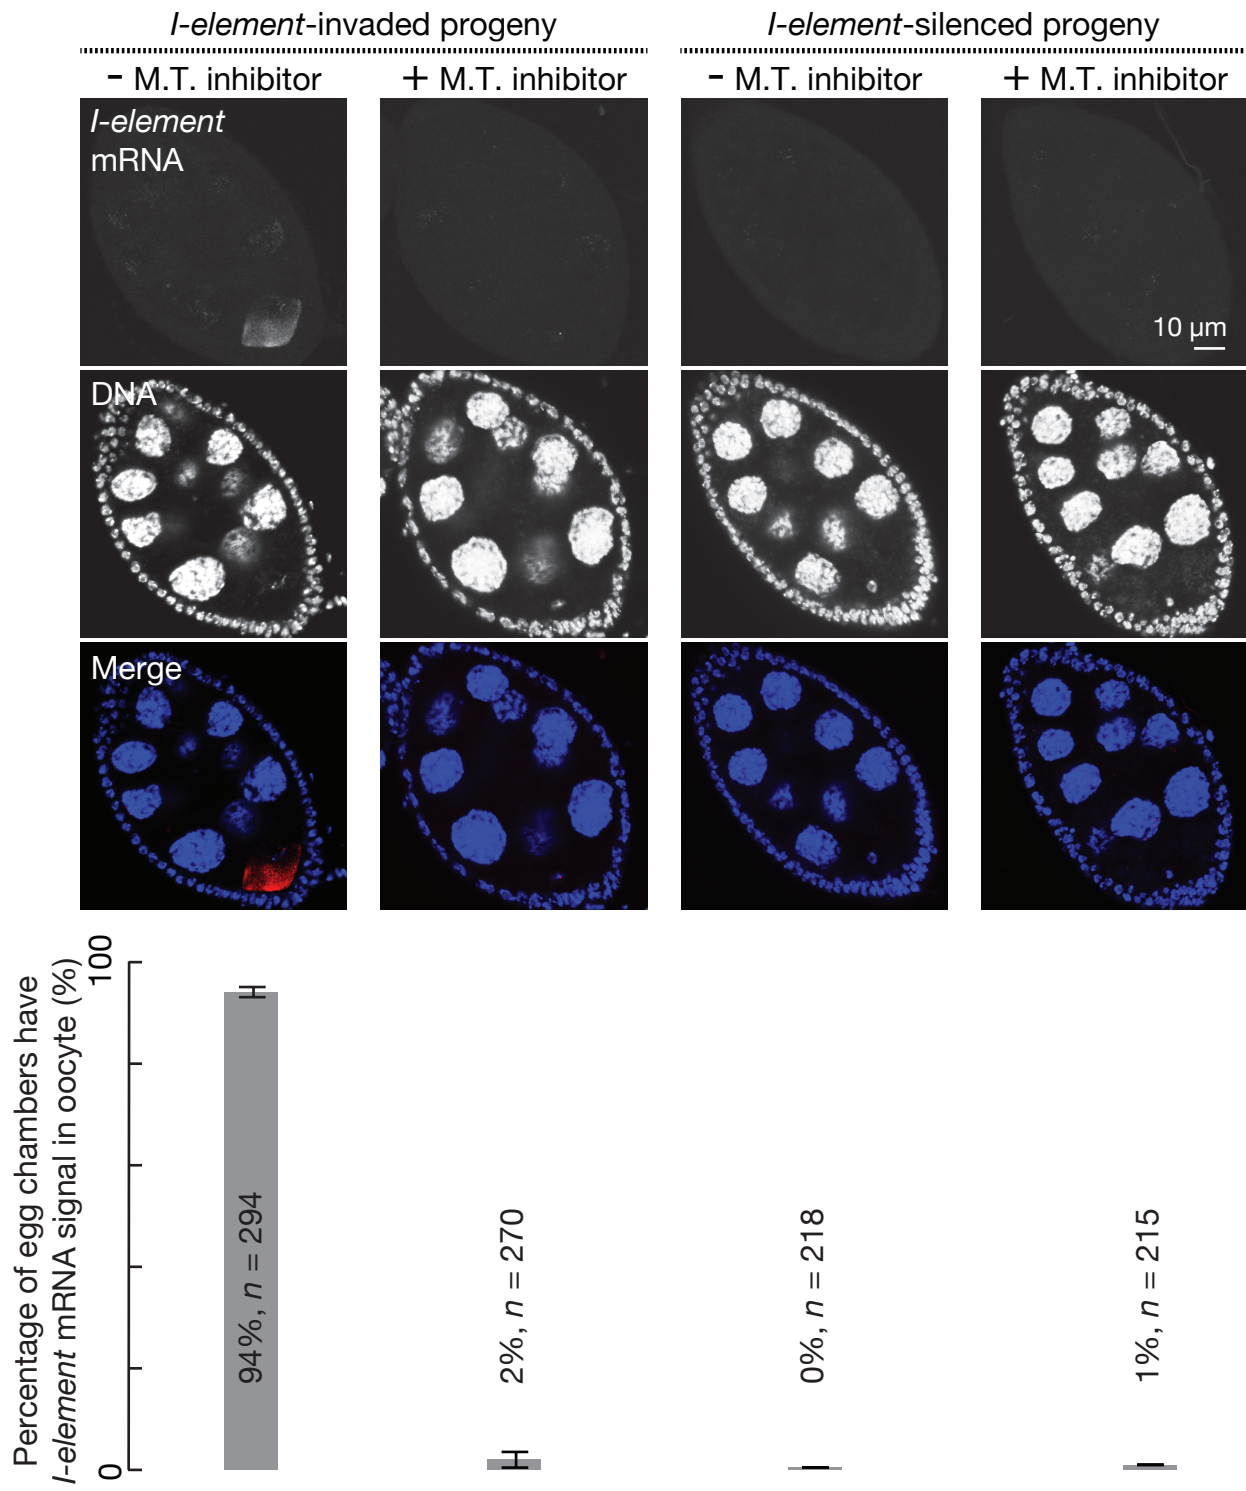

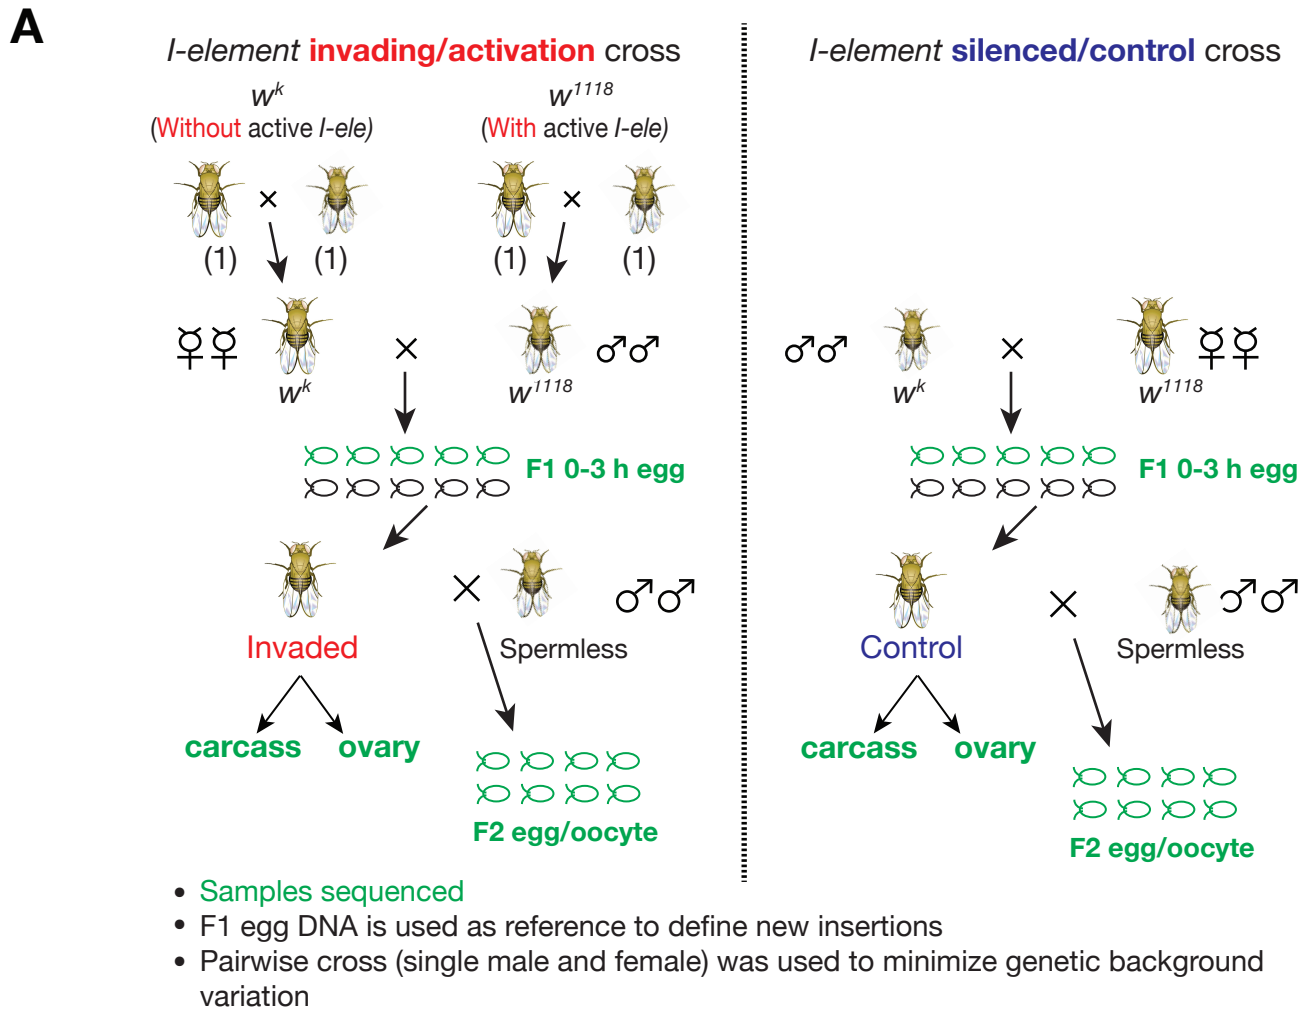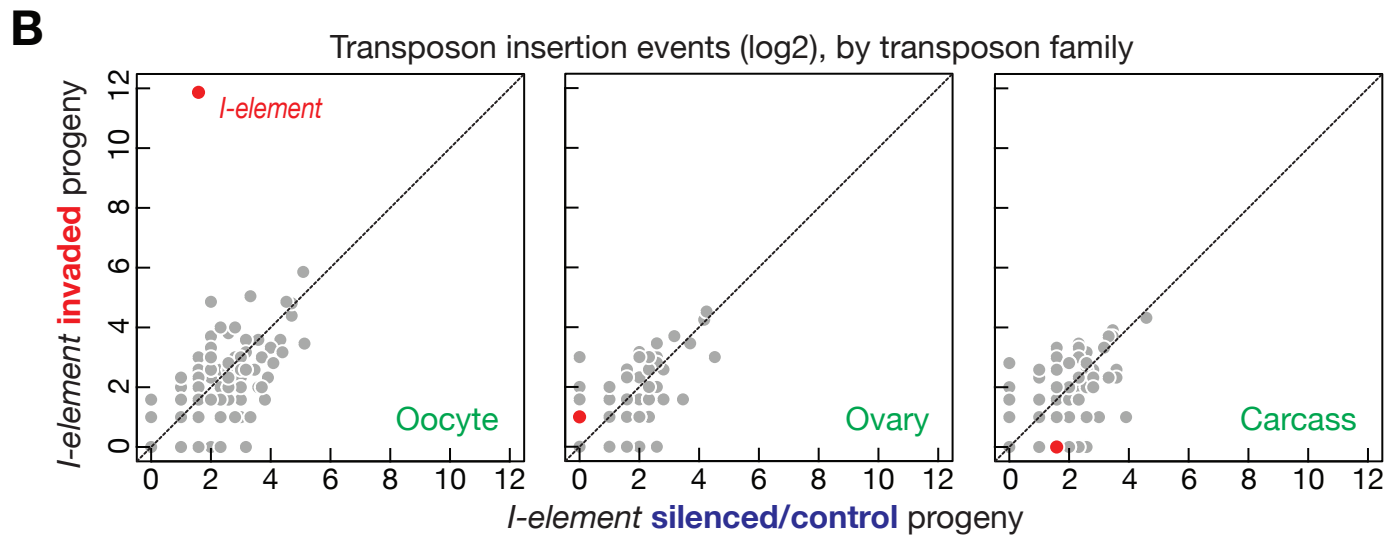

**A**

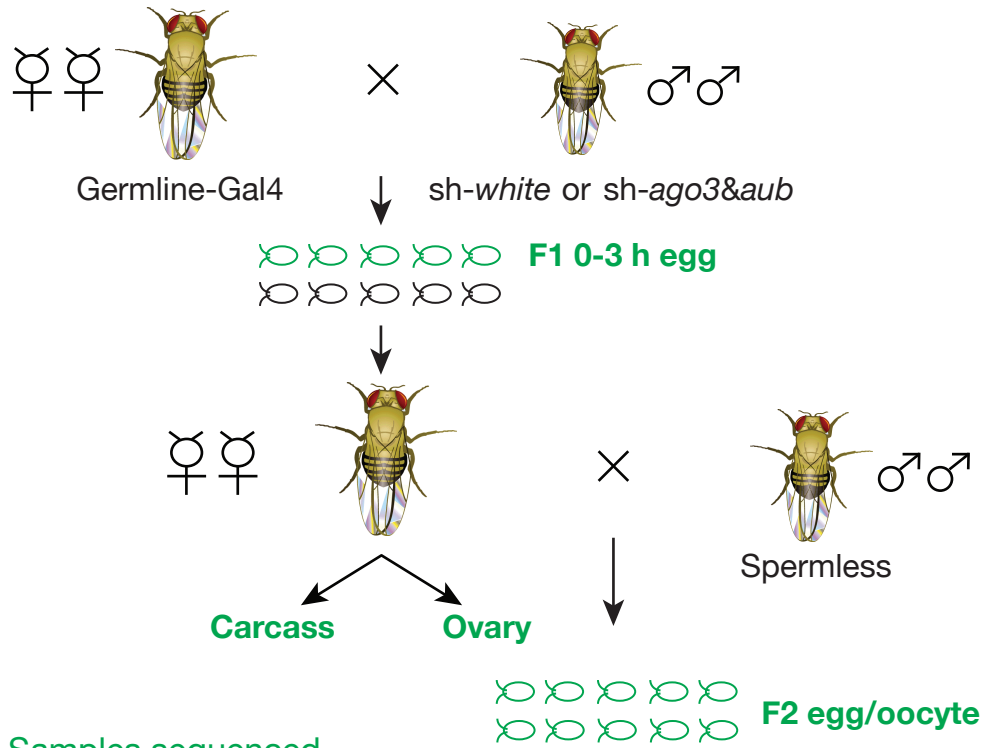

- Samples sequenced
- F1 egg DNA is used as reference to define new insertions
- Carcass DNA is used to estimate the false-positive insertion rate

**B**

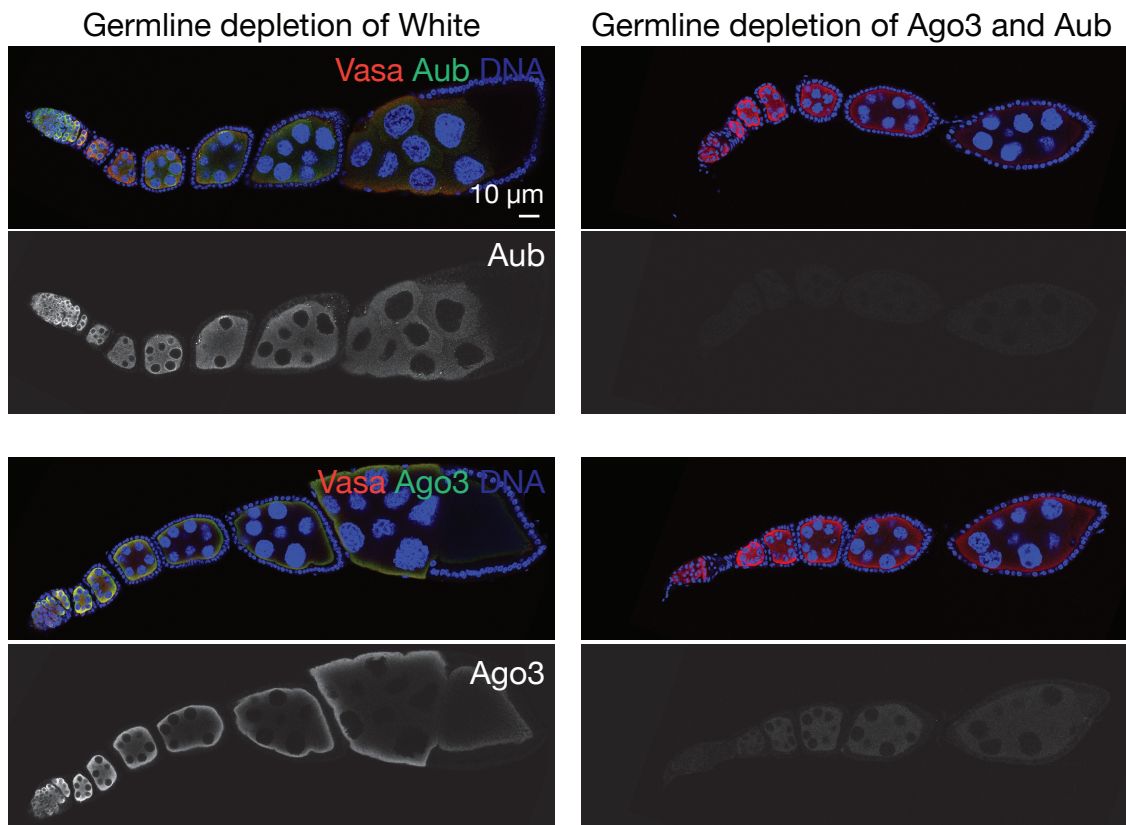

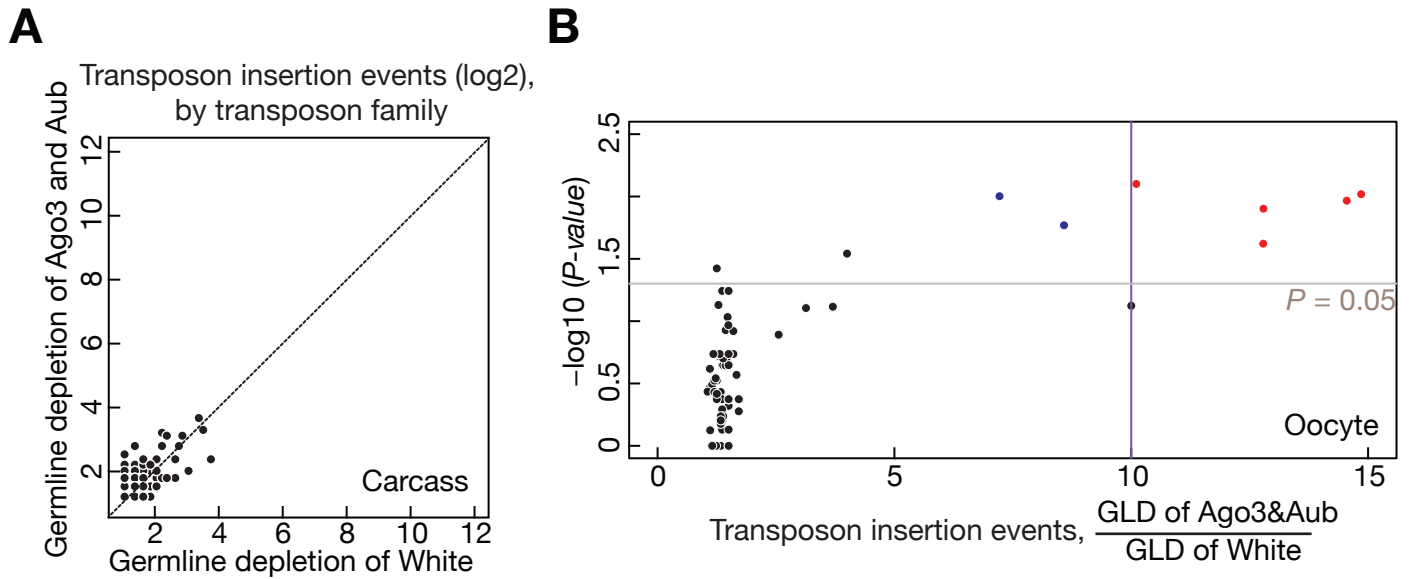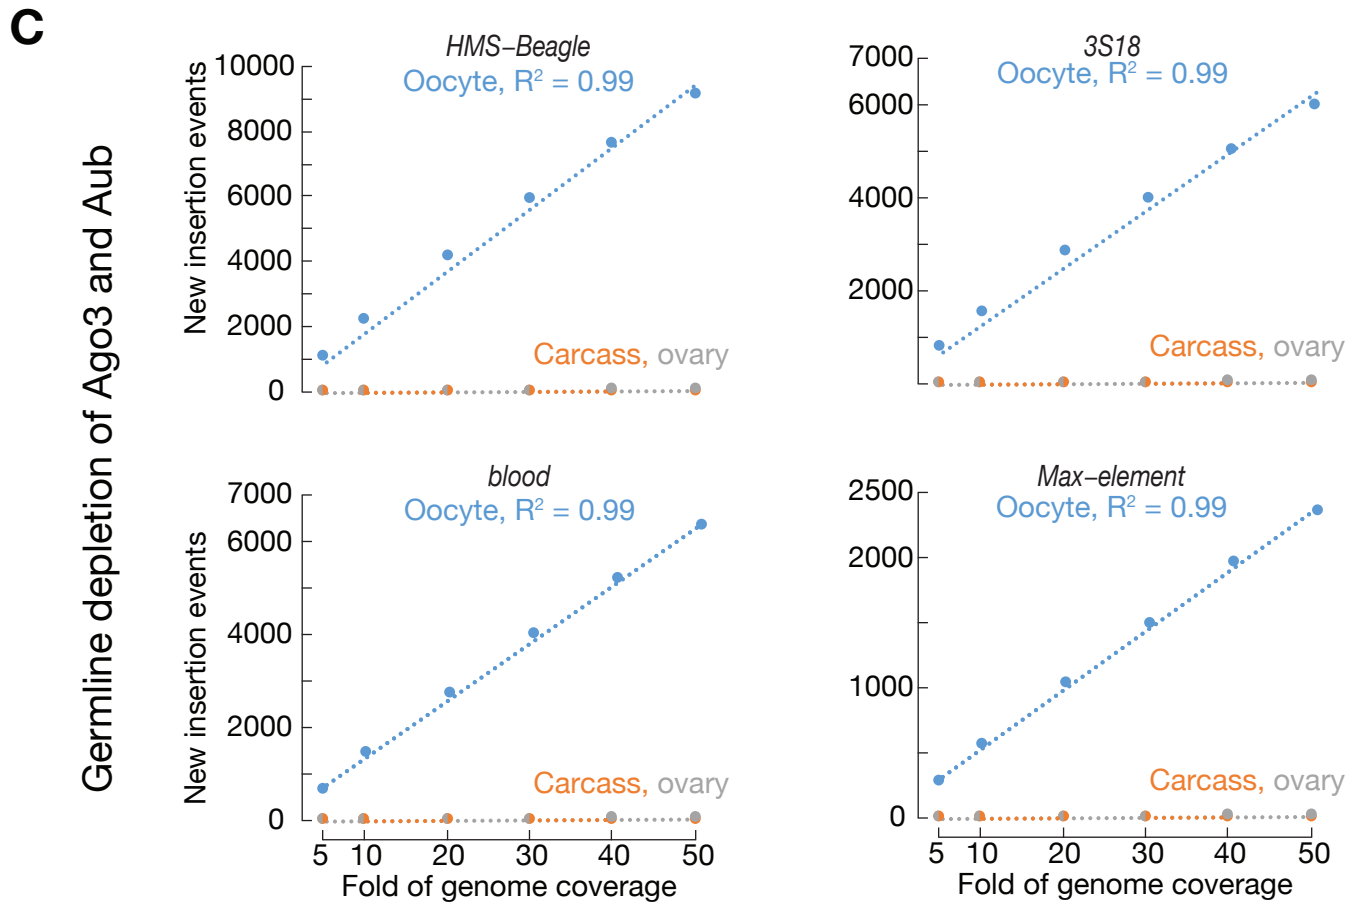

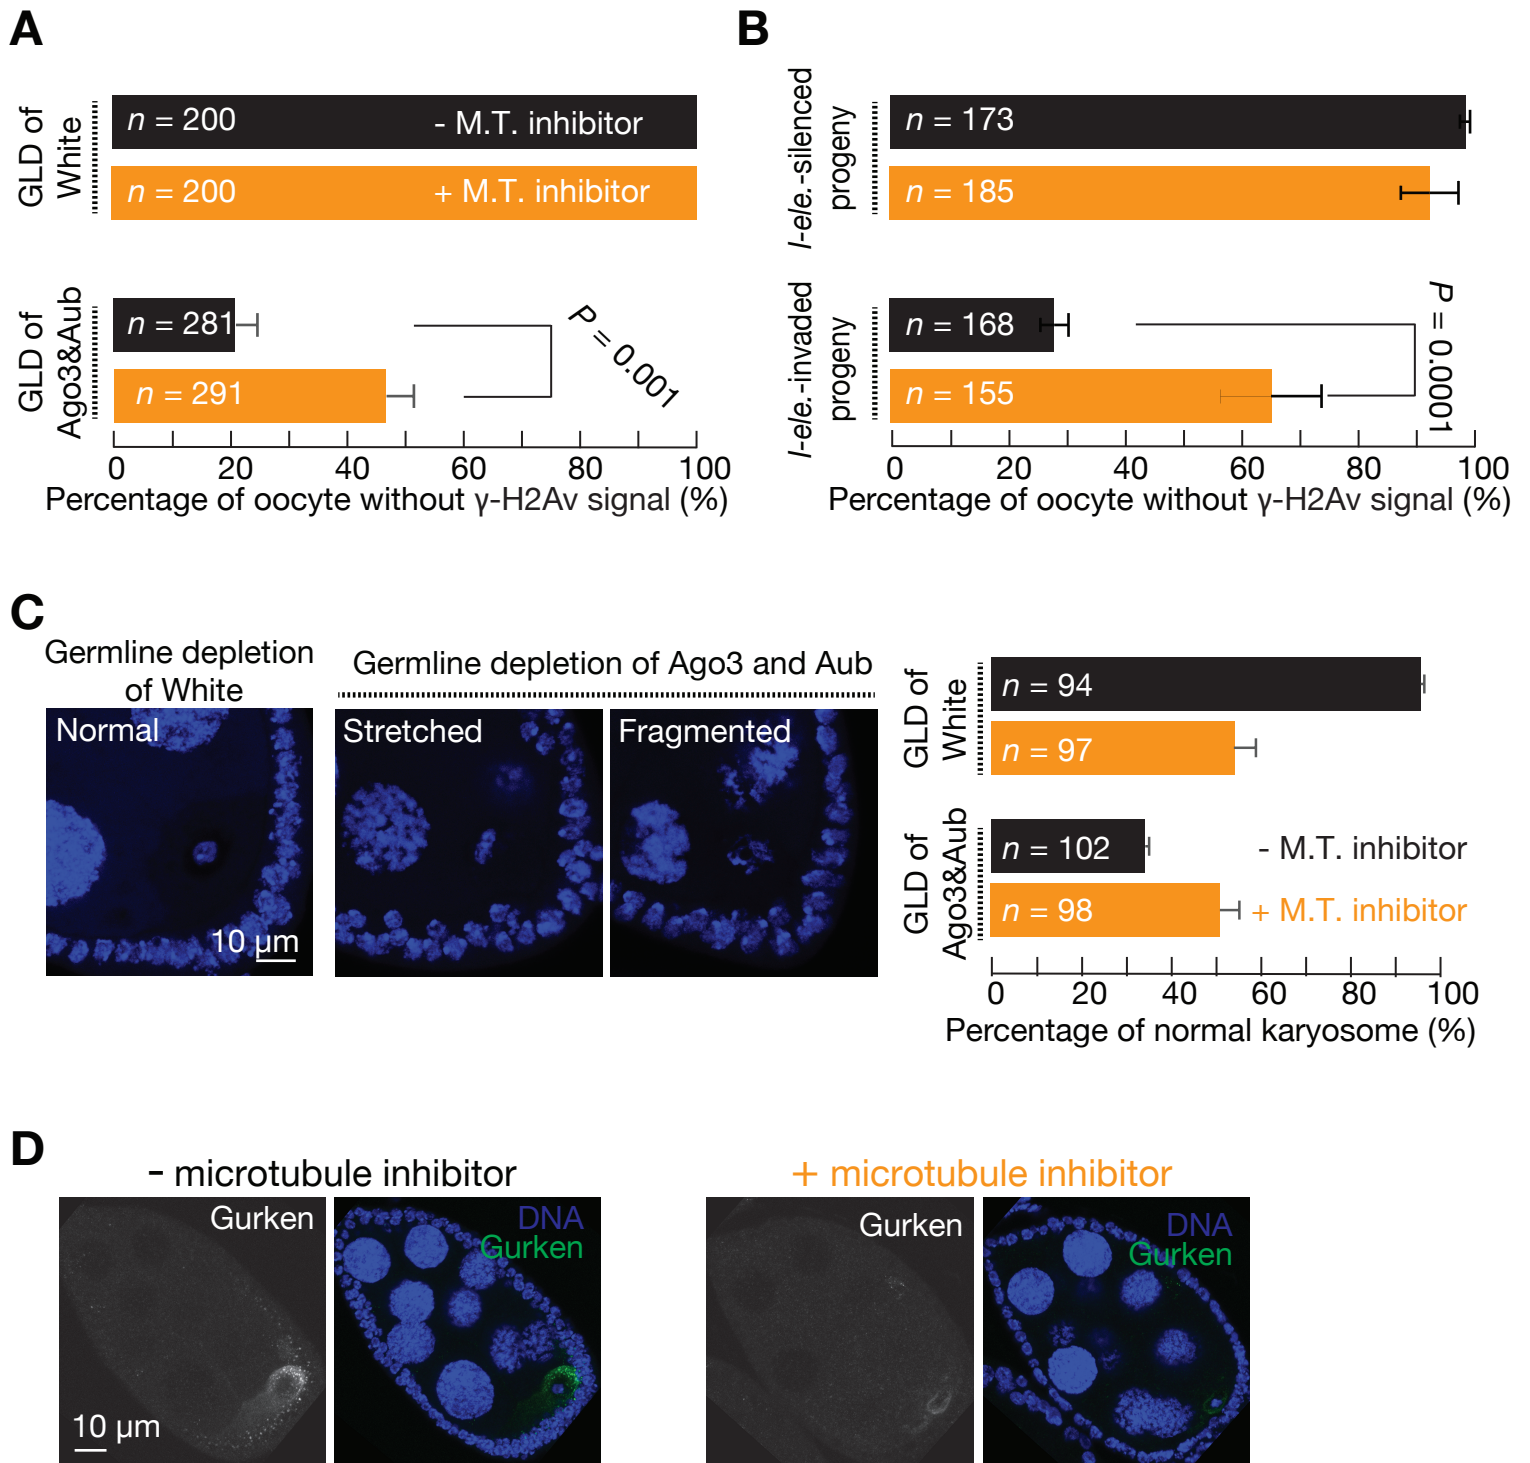

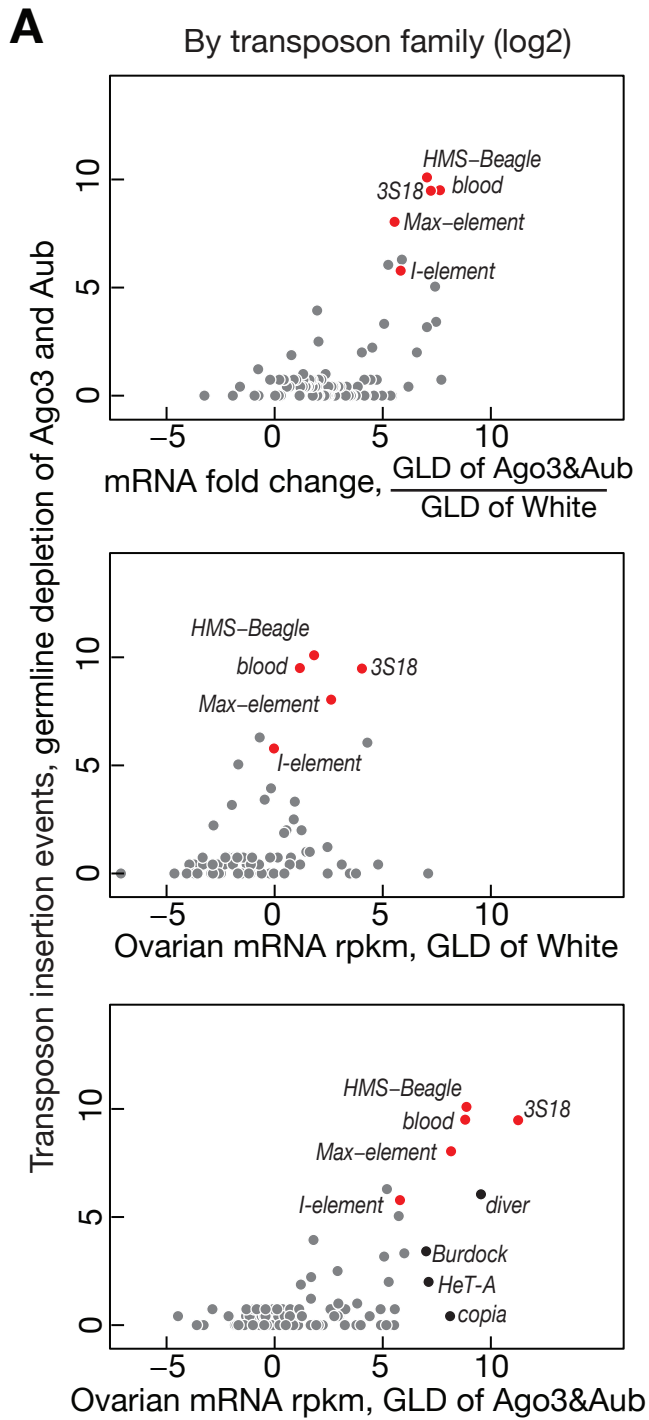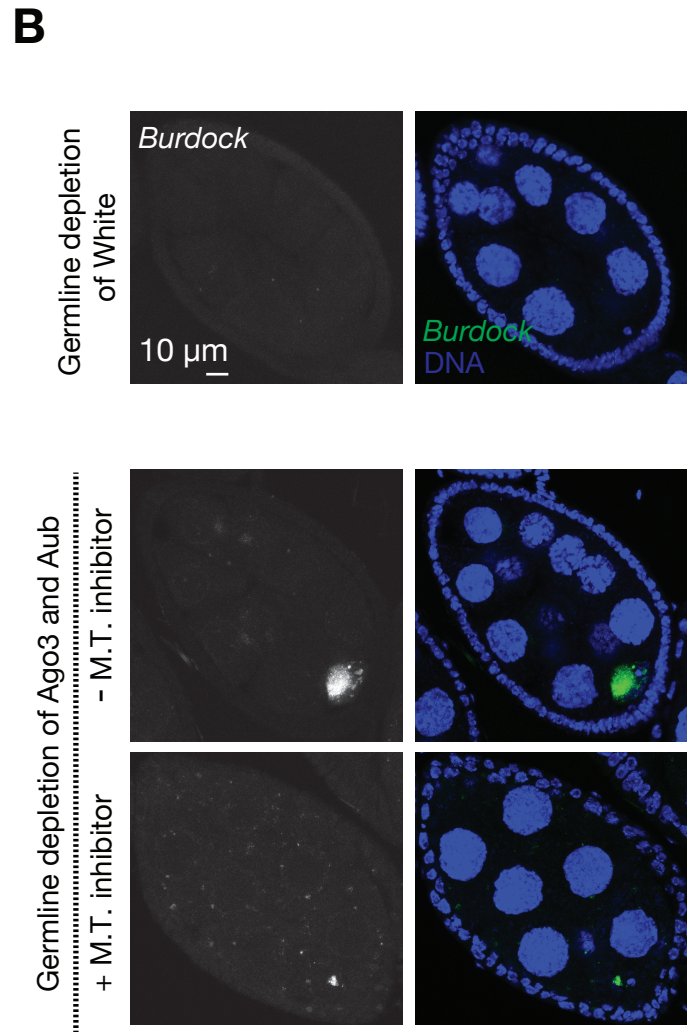

Supplement: NIHMS1038463-supplement-4.pdf [file NIHMS1038463-supplement-4.pdf]
